# Supplementary material
Source: publisher figshare collection journal article supplement (https://frontiersin.figshare.com/ndownloader/files/33286565)
Supplement: Supplementary file 1 [file 33286565]

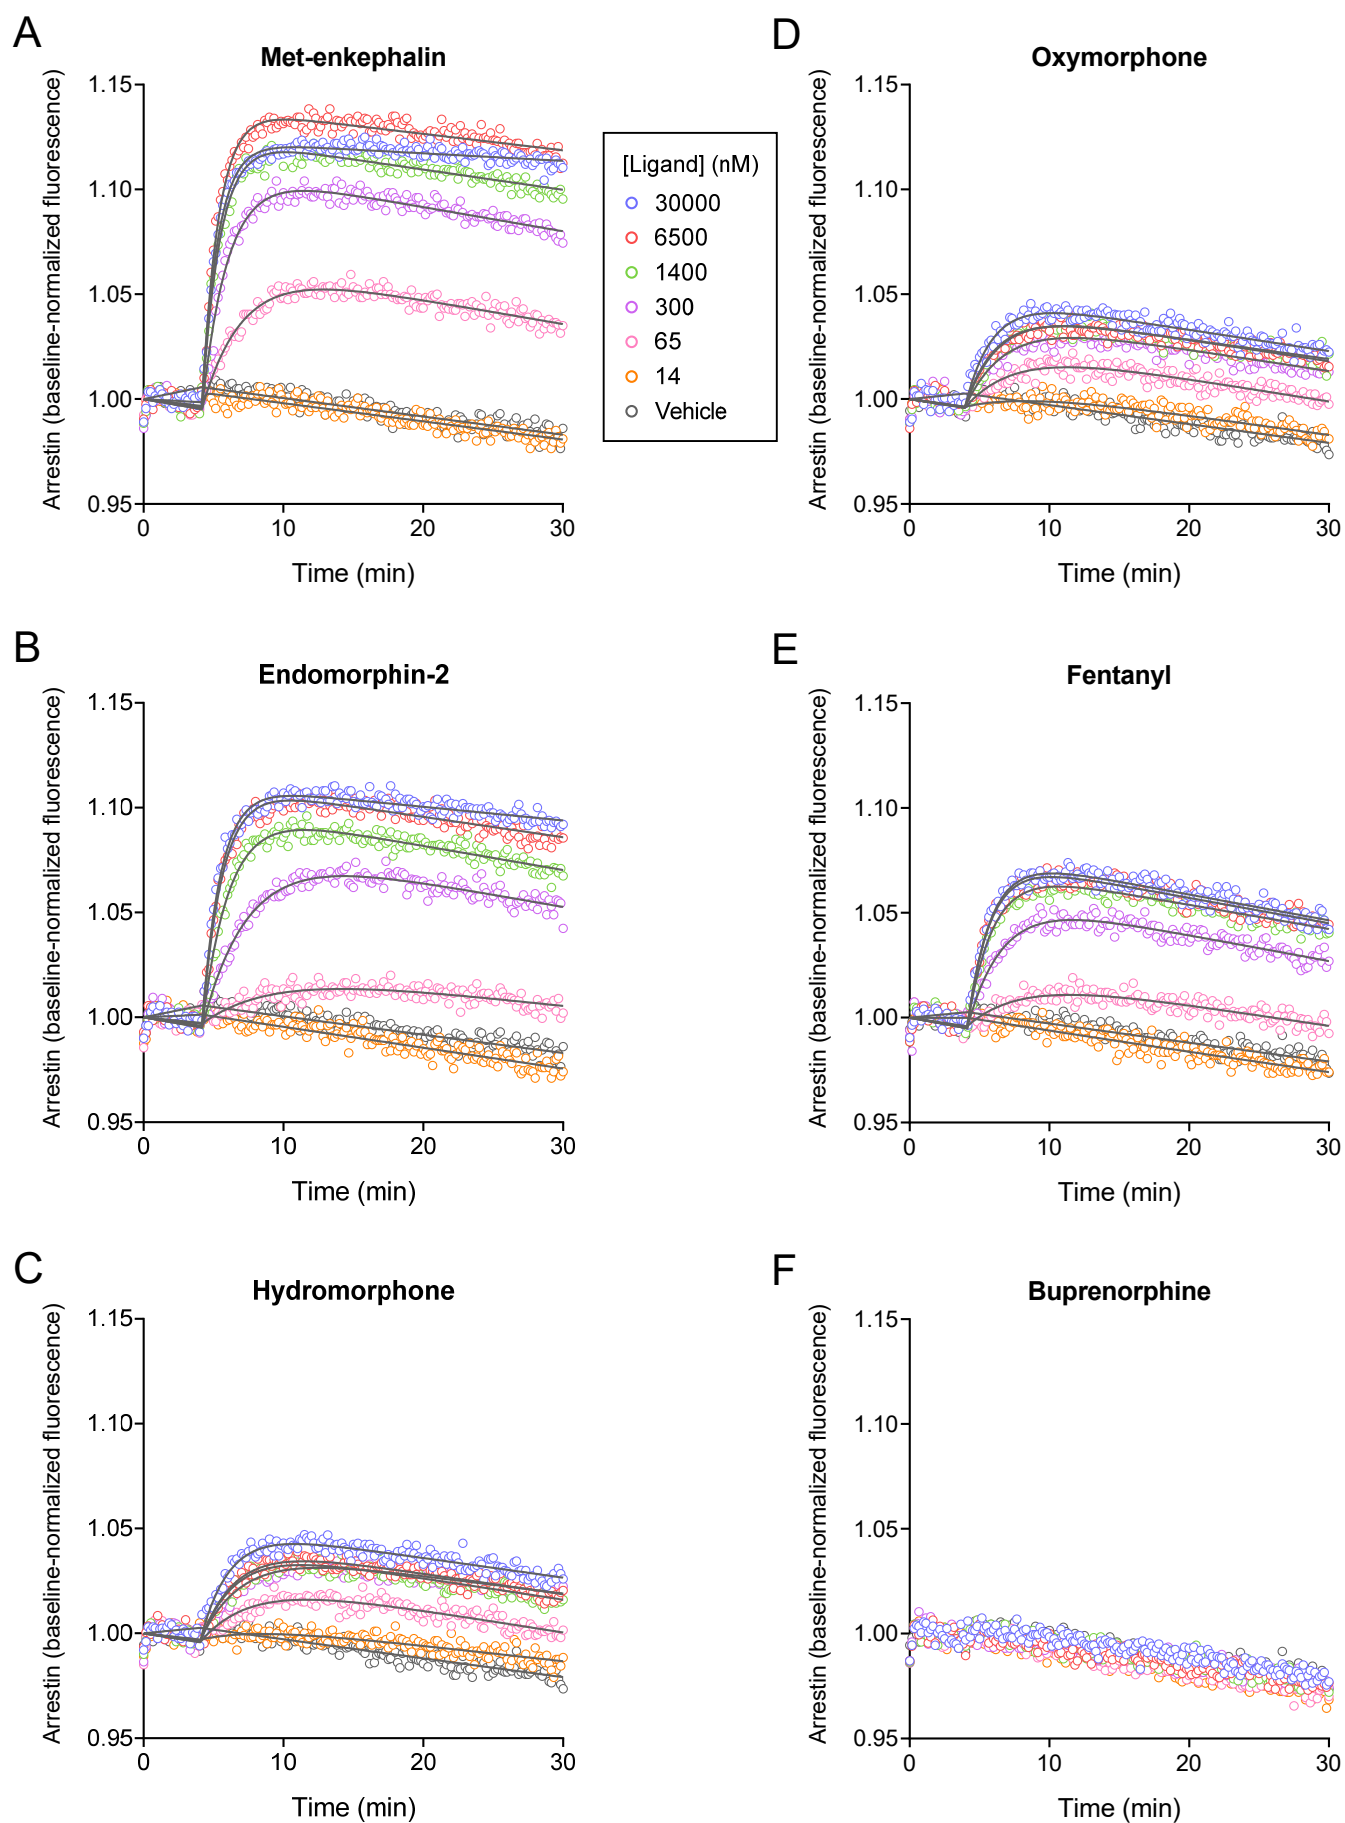

**Supplementary Figure 2.** Time course of arrestin recruitment to the  $\mu$ -opioid receptor stimulated by numerous agonist ligands. (Note DAMGO and morphine were also tested - see Figure 3.) Data are from a representative experiment and data points are the mean of two technical replicates. The grey lines are fits to the "Baseline then rise to steady state with drift" equation.
