# Supplementary material
Source: publisher figshare collection journal article supplement (https://frontiersin.figshare.com/ndownloader/files/33286565)

**Supplementary Figure 3.** Time course data for CB1-mediated membrane potential reduction by various CB1 agonists. Membrane potential was measured using a fluorescent dye in AtT20 cells and data normalized to the baseline signal before application of agonist (10  $\mu$ M) or vehicle. Data were analyzed by curve fitting to fall to steady-state equations as described in Materials and Methods. Data points are the mean of two technical replicates and data are from representative experiments.

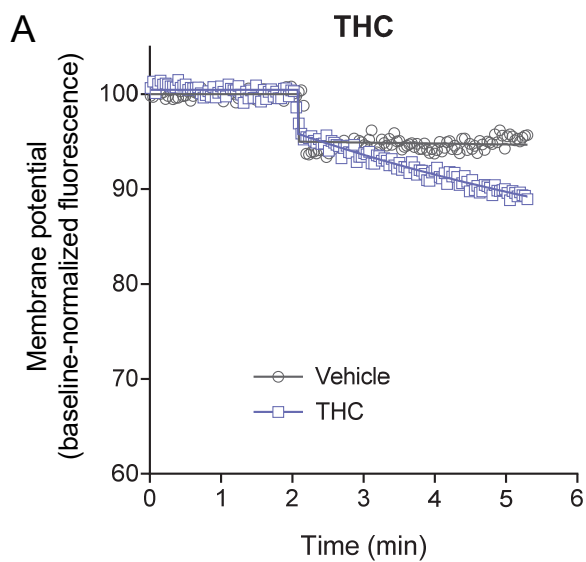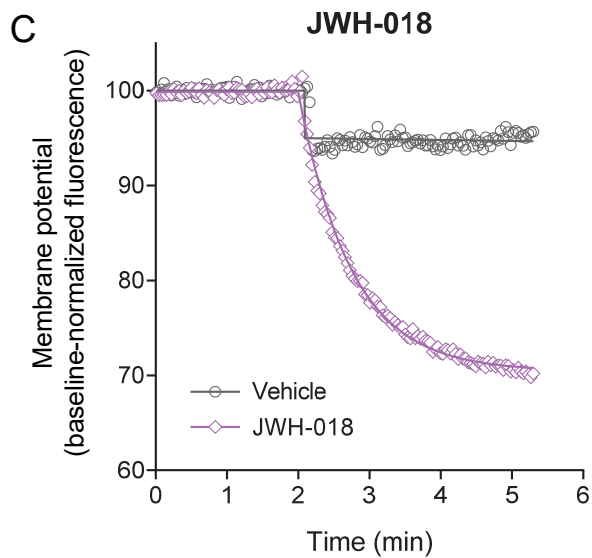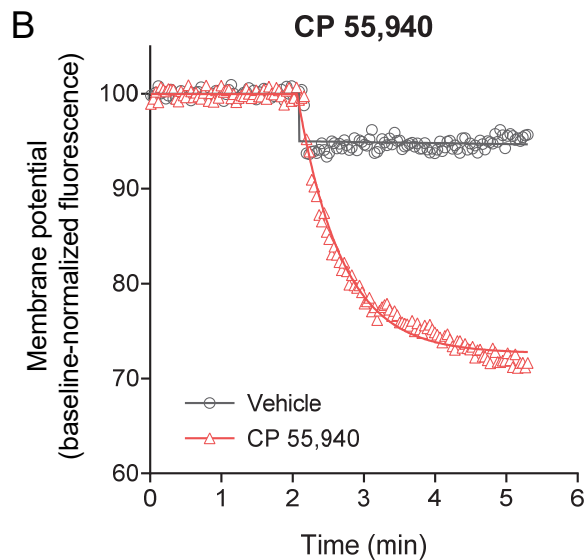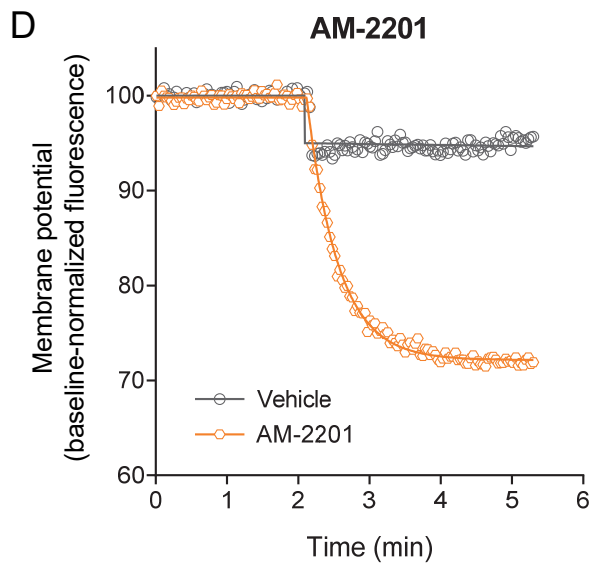

Supplementary Figure 3. continued

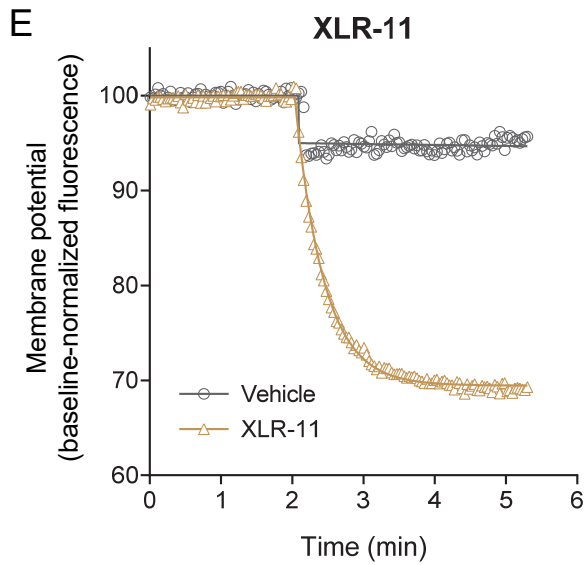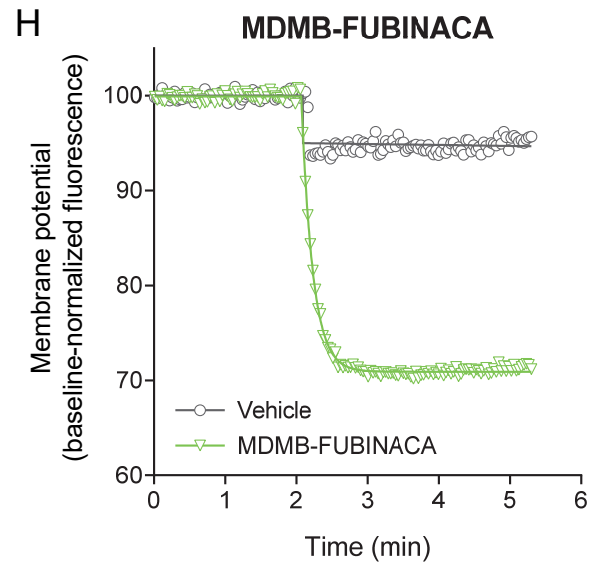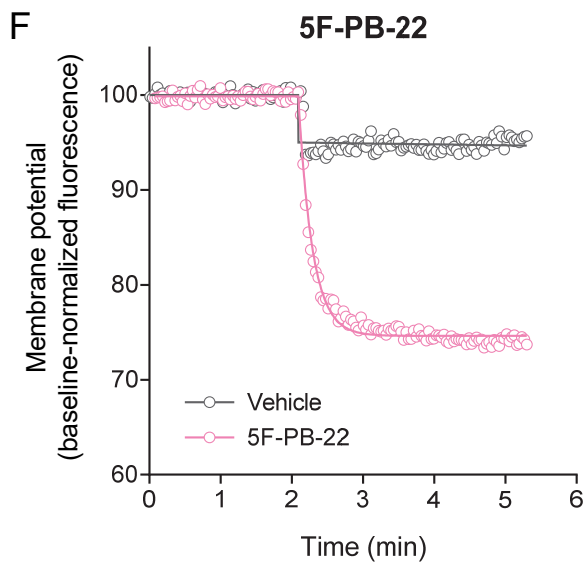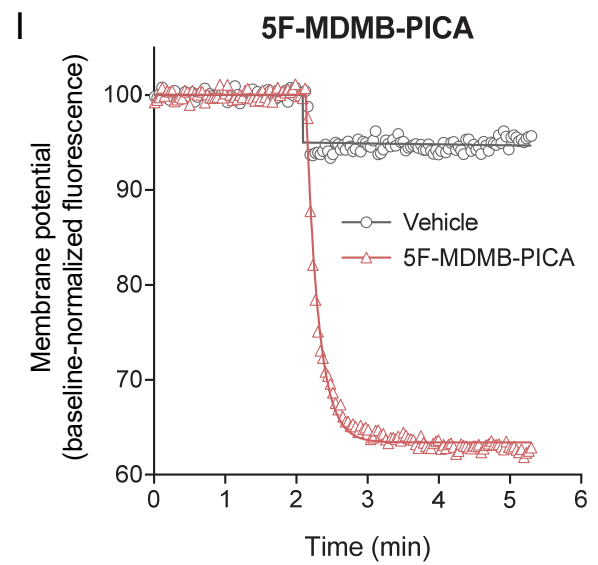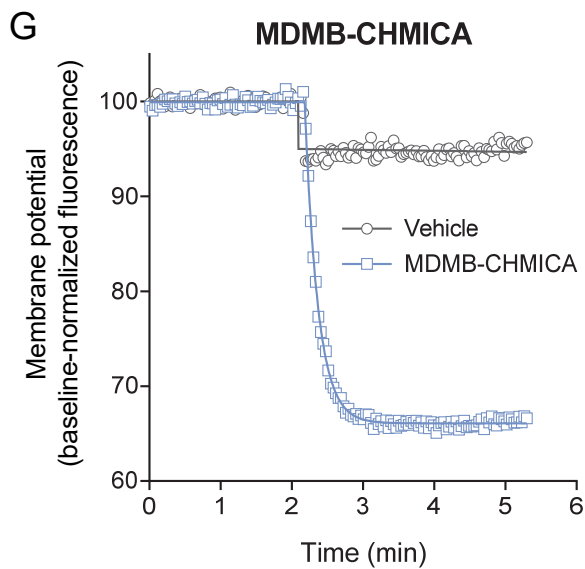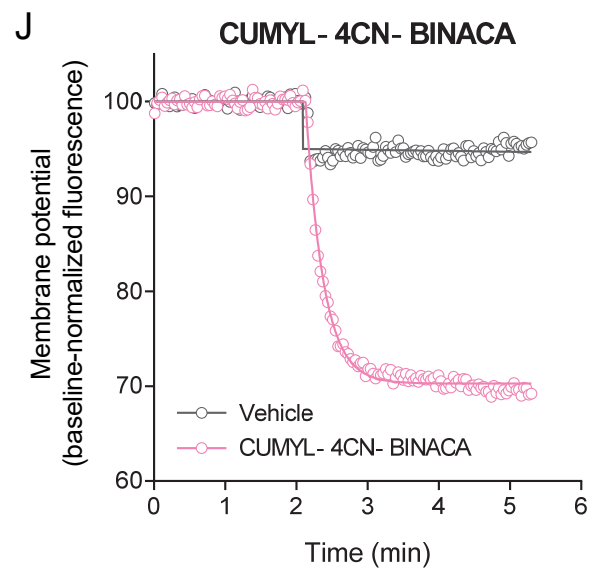

Supplement: Supplementary file 4 [file 33286565]
