# Supplementary material
Source: publisher figshare collection journal article supplement (https://frontiersin.figshare.com/ndownloader/files/33286565)
Supplement: Supplementary file 5 [file 33286565]

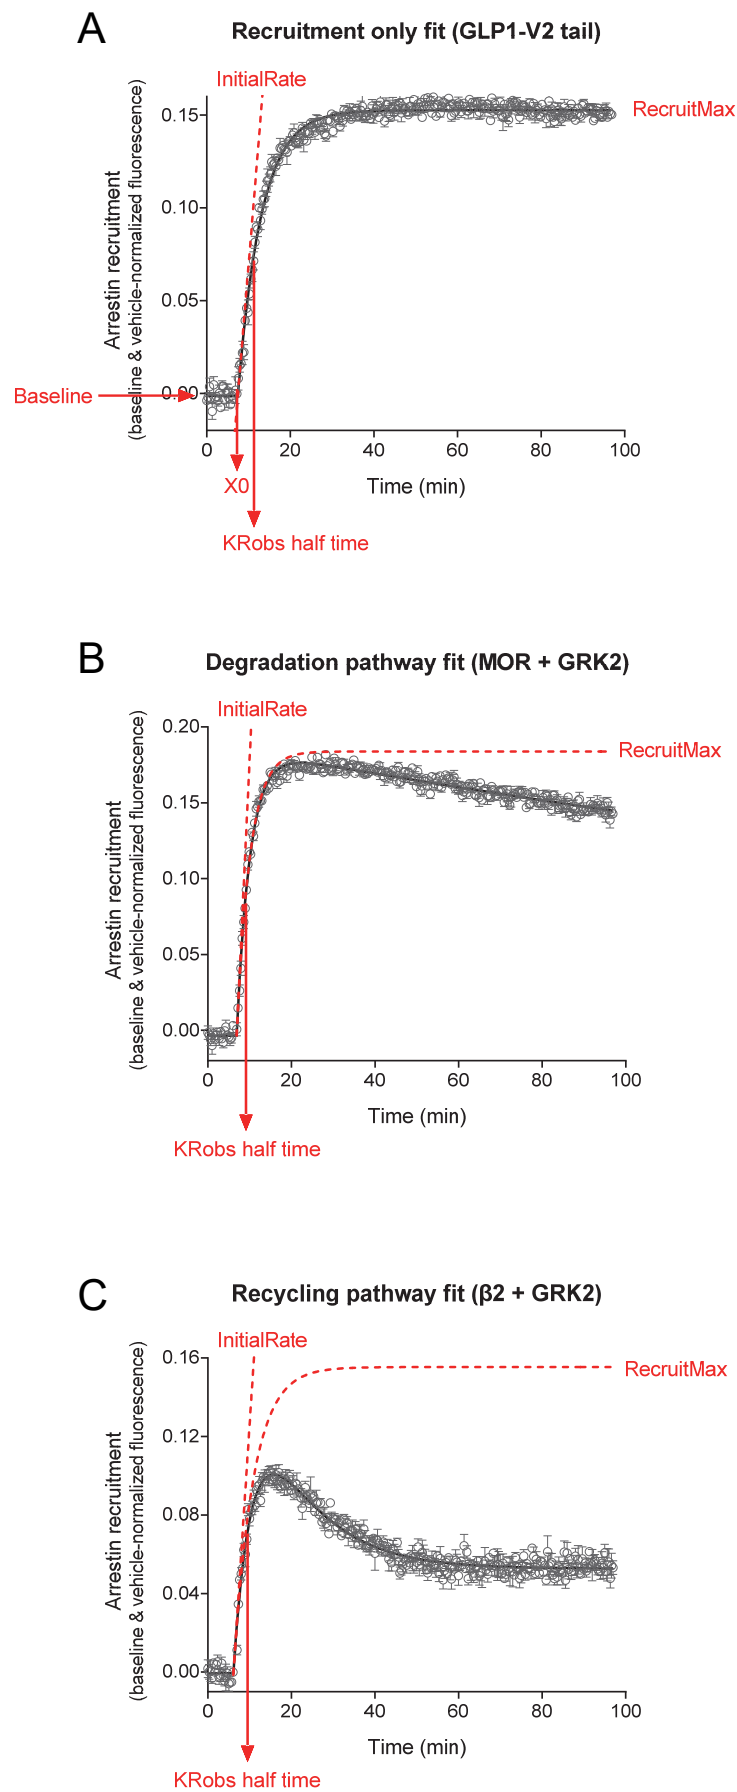

**Supplementary Figure 5.** Curve fit parameters for the three arrestin recruitment model equations. A) Arrestin recruitment only model, illustrating X0 (the signal start time), Baseline (the signal level before application of agonist), InitialRate (the gradient of the initial rate of recruitment), KRobs half-time (recruitment half time, equal to  $\ln(2) / K_{\text{Robs}}$ ), and RecruitMax (the recruitment level at infinite time). B) Degradation pathway model. C) Recycling pathway model. Note RecruitMax is the maximal level of the recruitment phase for the degradation and recycling pathway models. See Materials and Methods for equations.
